# Supplementary material
Source: PubMed Central journal article supplement (PMC4718403)
Supplement: NIHMS751000-supplement.pdf [file NIHMS751000-supplement.pdf]

**Supplementary Figure 1**

An example of the gene-term-disease network automatically generated by Phenolyzer web server for 'autism'.

The largest word represents the user's input term, 'Autism'. The pink round rectangles represent disease names corresponding to each term. The balls represent genes. The darker the color, the more the node contributes. The longer the round rectangles, the more a disease name contributes. The larger the ball, the more significantly a gene is related with the term. A reported gene is blue and a predicted gene is yellow. Four types of edges correspond to four different types of gene-gene relationships as illustrated in the legend. The figure can be zoomed in by mouse operations in the web server to facilitate closer examination of the edge types.



**a** Submission ID: 1955  
Dear Phenolyzer user, your submission (identifier: 1955) was received at Wed Aug 20 22:23:45 2014 and processed at Wed Aug 20 22:23:45 2014.

Submission information

Phenotypes are interpreted:  
Only at most 500 genes will be found in details, for the complete list, please download the report here:  
1 disease terms have been entered, among which, 1 terms have corresponding records in our database.  
They are: **Huntington**  
The whole report could be found [here](#).  
The normalized gene scores could be found [here](#).  
The report without prediction could be found [here](#).  
The normalized gene scores without prediction could be found [here](#).



**d**

| Gene       | Reported | Score       |
|------------|----------|-------------|
| 1 HTT      | Reported | Score 9.025 |
| 2 RII1     | Reported | Score 8.025 |
| 3 RII2     | Reported | Score 8.025 |
| 4 RII3     | Reported | Score 8.025 |
| 5 RII4     | Reported | Score 8.025 |
| 6 RII5     | Reported | Score 8.025 |
| 7 RII6     | Reported | Score 8.025 |
| 8 RII7     | Reported | Score 8.025 |
| 9 RII8     | Reported | Score 8.025 |
| 10 RII9    | Reported | Score 8.025 |
| 11 RII10   | Reported | Score 8.025 |
| 12 RII11   | Reported | Score 8.025 |
| 13 RII12   | Reported | Score 8.025 |
| 14 RII13   | Reported | Score 8.025 |
| 15 RII14   | Reported | Score 8.025 |
| 16 RII15   | Reported | Score 8.025 |
| 17 RII16   | Reported | Score 8.025 |
| 18 RII17   | Reported | Score 8.025 |
| 19 RII18   | Reported | Score 8.025 |
| 20 RII19   | Reported | Score 8.025 |
| 21 RII20   | Reported | Score 8.025 |
| 22 RII21   | Reported | Score 8.025 |
| 23 RII22   | Reported | Score 8.025 |
| 24 RII23   | Reported | Score 8.025 |
| 25 RII24   | Reported | Score 8.025 |
| 26 RII25   | Reported | Score 8.025 |
| 27 RII26   | Reported | Score 8.025 |
| 28 RII27   | Reported | Score 8.025 |
| 29 RII28   | Reported | Score 8.025 |
| 30 RII29   | Reported | Score 8.025 |
| 31 RII30   | Reported | Score 8.025 |
| 32 RII31   | Reported | Score 8.025 |
| 33 RII32   | Reported | Score 8.025 |
| 34 RII33   | Reported | Score 8.025 |
| 35 RII34   | Reported | Score 8.025 |
| 36 RII35   | Reported | Score 8.025 |
| 37 RII36   | Reported | Score 8.025 |
| 38 RII37   | Reported | Score 8.025 |
| 39 RII38   | Reported | Score 8.025 |
| 40 RII39   | Reported | Score 8.025 |
| 41 RII40   | Reported | Score 8.025 |
| 42 RII41   | Reported | Score 8.025 |
| 43 RII42   | Reported | Score 8.025 |
| 44 RII43   | Reported | Score 8.025 |
| 45 RII44   | Reported | Score 8.025 |
| 46 RII45   | Reported | Score 8.025 |
| 47 RII46   | Reported | Score 8.025 |
| 48 RII47   | Reported | Score 8.025 |
| 49 RII48   | Reported | Score 8.025 |
| 50 RII49   | Reported | Score 8.025 |
| 51 RII50   | Reported | Score 8.025 |
| 52 RII51   | Reported | Score 8.025 |
| 53 RII52   | Reported | Score 8.025 |
| 54 RII53   | Reported | Score 8.025 |
| 55 RII54   | Reported | Score 8.025 |
| 56 RII55   | Reported | Score 8.025 |
| 57 RII56   | Reported | Score 8.025 |
| 58 RII57   | Reported | Score 8.025 |
| 59 RII58   | Reported | Score 8.025 |
| 60 RII59   | Reported | Score 8.025 |
| 61 RII60   | Reported | Score 8.025 |
| 62 RII61   | Reported | Score 8.025 |
| 63 RII62   | Reported | Score 8.025 |
| 64 RII63   | Reported | Score 8.025 |
| 65 RII64   | Reported | Score 8.025 |
| 66 RII65   | Reported | Score 8.025 |
| 67 RII66   | Reported | Score 8.025 |
| 68 RII67   | Reported | Score 8.025 |
| 69 RII68   | Reported | Score 8.025 |
| 70 RII69   | Reported | Score 8.025 |
| 71 RII70   | Reported | Score 8.025 |
| 72 RII71   | Reported | Score 8.025 |
| 73 RII72   | Reported | Score 8.025 |
| 74 RII73   | Reported | Score 8.025 |
| 75 RII74   | Reported | Score 8.025 |
| 76 RII75   | Reported | Score 8.025 |
| 77 RII76   | Reported | Score 8.025 |
| 78 RII77   | Reported | Score 8.025 |
| 79 RII78   | Reported | Score 8.025 |
| 80 RII79   | Reported | Score 8.025 |
| 81 RII80   | Reported | Score 8.025 |
| 82 RII81   | Reported | Score 8.025 |
| 83 RII82   | Reported | Score 8.025 |
| 84 RII83   | Reported | Score 8.025 |
| 85 RII84   | Reported | Score 8.025 |
| 86 RII85   | Reported | Score 8.025 |
| 87 RII86   | Reported | Score 8.025 |
| 88 RII87   | Reported | Score 8.025 |
| 89 RII88   | Reported | Score 8.025 |
| 90 RII89   | Reported | Score 8.025 |
| 91 RII90   | Reported | Score 8.025 |
| 92 RII91   | Reported | Score 8.025 |
| 93 RII92   | Reported | Score 8.025 |
| 94 RII93   | Reported | Score 8.025 |
| 95 RII94   | Reported | Score 8.025 |
| 96 RII95   | Reported | Score 8.025 |
| 97 RII96   | Reported | Score 8.025 |
| 98 RII97   | Reported | Score 8.025 |
| 99 RII98   | Reported | Score 8.025 |
| 100 RII99  | Reported | Score 8.025 |
| 101 RII100 | Reported | Score 8.025 |
| 102 RII101 | Reported | Score 8.025 |
| 103 RII102 | Reported | Score 8.025 |
| 104 RII103 | Reported | Score 8.025 |
| 105 RII104 | Reported | Score 8.025 |
| 106 RII105 | Reported | Score 8.025 |
| 107 RII106 | Reported | Score 8.025 |
| 108 RII107 | Reported | Score 8.025 |
| 109 RII108 | Reported | Score 8.025 |
| 110 RII109 | Reported | Score 8.025 |
| 111 RII110 | Reported | Score 8.025 |
| 112 RII111 | Reported | Score 8.025 |
| 113 RII112 | Reported | Score 8.025 |
| 114 RII113 | Reported | Score 8.025 |
| 115 RII114 | Reported | Score 8.025 |
| 116 RII115 | Reported | Score 8.025 |
| 117 RII116 | Reported | Score 8.025 |
| 118 RII117 | Reported | Score 8.025 |
| 119 RII118 | Reported | Score 8.025 |
| 120 RII119 | Reported | Score 8.025 |
| 121 RII120 | Reported | Score 8.025 |
| 122 RII121 | Reported | Score 8.025 |
| 123 RII122 | Reported | Score 8.025 |
| 124 RII123 | Reported | Score 8.025 |
| 125 RII124 | Reported | Score 8.025 |
| 126 RII125 | Reported | Score 8.025 |
| 127 RII126 | Reported | Score 8.025 |
| 128 RII127 | Reported | Score 8.025 |
| 129 RII128 | Reported | Score 8.025 |
| 130 RII129 | Reported | Score 8.025 |
| 131 RII130 | Reported | Score 8.025 |
| 132 RII131 | Reported | Score 8.025 |
| 133 RII132 | Reported | Score 8.025 |
| 134 RII133 | Reported | Score 8.025 |
| 135 RII134 | Reported | Score 8.025 |
| 136 RII135 | Reported | Score 8.025 |
| 137 RII136 | Reported | Score 8.025 |
| 138 RII137 | Reported | Score 8.025 |
| 139 RII138 | Reported | Score 8.025 |
| 140 RII139 | Reported | Score 8.025 |
| 141 RII140 | Reported | Score 8.025 |
| 142 RII141 | Reported | Score 8.025 |
| 143 RII142 | Reported | Score 8.025 |
| 144 RII143 | Reported | Score 8.025 |
| 145 RII144 | Reported | Score 8.025 |
| 146 RII145 | Reported | Score 8.025 |
| 147 RII146 | Reported | Score 8.025 |
| 148 RII147 | Reported | Score 8.025 |
| 149 RII148 | Reported | Score 8.025 |
| 150 RII149 | Reported | Score 8.025 |
| 151 RII150 | Reported | Score 8.025 |
| 152 RII151 | Reported | Score 8.025 |
| 153 RII152 | Reported | Score 8.025 |
| 154 RII153 | Reported | Score 8.025 |
| 155 RII154 | Reported | Score 8.025 |
| 156 RII155 | Reported | Score 8.025 |
| 157 RII156 | Reported | Score 8.025 |
| 158 RII157 | Reported | Score 8.025 |
| 159 RII158 | Reported | Score 8.025 |
| 160 RII159 | Reported | Score 8.025 |
| 161 RII160 | Reported | Score 8.025 |
| 162 RII161 | Reported | Score 8.025 |
| 163 RII162 | Reported | Score 8.025 |
| 164 RII163 | Reported | Score 8.025 |
| 165 RII164 | Reported | Score 8.025 |
| 166 RII165 | Reported | Score 8.025 |
| 167 RII166 | Reported | Score 8.025 |
| 168 RII167 | Reported | Score 8.025 |
| 169 RII168 | Reported | Score 8.025 |
| 170 RII169 | Reported | Score 8.025 |
| 171 RII170 | Reported | Score 8.025 |
| 172 RII171 | Reported | Score 8.025 |
| 173 RII172 | Reported | Score 8.025 |
| 174 RII173 | Reported | Score 8.025 |
| 175 RII174 | Reported | Score 8.025 |
| 176 RII175 | Reported | Score 8.025 |
| 177 RII176 | Reported | Score 8.025 |
| 178 RII177 | Reported | Score 8.025 |
| 179 RII178 | Reported | Score 8.025 |
| 180 RII179 | Reported | Score 8.025 |
| 181 RII180 | Reported | Score 8.025 |
| 182 RII181 | Reported | Score 8.025 |
| 183 RII182 | Reported | Score 8.025 |
| 184 RII183 | Reported | Score 8.025 |
| 185 RII184 | Reported | Score 8.025 |
| 186 RII185 | Reported | Score 8.025 |
| 187 RII186 | Reported | Score 8.025 |
| 188 RII187 | Reported | Score 8.025 |
| 189 RII188 | Reported | Score 8.025 |
| 190 RII189 | Reported | Score 8.025 |
| 191 RII190 | Reported | Score 8.025 |
| 192 RII191 | Reported | Score 8.025 |
| 193 RII192 | Reported | Score 8.025 |
| 194 RII193 | Reported | Score 8.025 |
| 195 RII194 | Reported | Score 8.025 |
| 196 RII195 | Reported | Score 8.025 |
| 197 RII196 | Reported | Score 8.025 |
| 198 RII197 | Reported | Score 8.025 |
| 199 RII198 | Reported | Score 8.025 |
| 200 RII199 | Reported | Score 8.025 |
| 201 RII200 | Reported | Score 8.025 |
| 202 RII201 | Reported | Score 8.025 |
| 203 RII202 | Reported | Score 8.025 |
| 204 RII203 | Reported | Score 8.025 |
| 205 RII204 | Reported | Score 8.025 |
| 206 RII205 | Reported | Score 8.025 |
| 207 RII206 | Reported | Score 8.025 |
| 208 RII207 | Reported | Score 8.025 |
| 209 RII208 | Reported | Score 8.025 |
| 210 RII209 | Reported | Score 8.025 |
| 211 RII210 | Reported | Score 8.025 |
| 212 RII211 | Reported | Score 8.025 |
| 213 RII212 | Reported | Score 8.025 |
| 214 RII213 | Reported | Score 8.025 |
| 215 RII214 | Reported | Score 8.025 |
| 216 RII215 | Reported | Score 8.025 |
| 217 RII216 | Reported | Score 8.025 |
| 218 RII217 | Reported | Score 8.025 |
| 219 RII218 | Reported | Score 8.025 |
| 220 RII219 | Reported | Score 8.025 |
| 221 RII220 | Reported | Score 8.025 |
| 222 RII221 | Reported | Score 8.025 |
| 223 RII222 | Reported | Score 8.025 |
| 224 RII223 | Reported | Score 8.025 |
| 225 RII224 | Reported | Score 8.025 |
| 226 RII225 | Reported | Score 8.025 |
| 227 RII226 | Reported | Score 8.025 |
| 228 RII227 | Reported | Score 8.025 |
| 229 RII228 | Reported | Score 8.025 |
| 230 RII229 | Reported | Score 8.025 |
| 231 RII230 | Reported | Score 8.025 |
| 232 RII231 | Reported | Score 8.025 |
| 233 RII232 | Reported | Score 8.025 |
| 234 RII233 | Reported | Score 8.025 |
| 235 RII234 | Reported | Score 8.025 |
| 236 RII235 | Reported | Score 8.025 |
| 237 RII236 | Reported | Score 8.025 |
| 238 RII237 | Reported | Score 8.025 |
| 239 RII238 | Reported | Score 8.025 |
| 240 RII239 | Reported | Score 8.025 |
| 241 RII240 | Reported | Score 8.025 |
| 242 RII241 | Reported | Score 8.025 |
| 243 RII242 | Reported | Score 8.025 |
| 244 RII243 | Reported | Score 8.025 |
| 245 RII244 | Reported | Score 8.025 |
| 246 RII245 | Reported | Score 8.025 |
| 247 RII246 | Reported | Score 8.025 |
| 248 RII247 | Reported | Score 8.025 |
| 249 RII248 | Reported | Score 8.025 |
| 250 RII249 | Reported | Score 8.025 |
| 251 RII250 | Reported | Score 8.025 |
| 252 RII251 | Reported | Score       |



Supplementary Figure 4

### **Comparison between Phenolyzer and other tools to find disease genes for cancer, rheumatoid arthritis, autism and anemia.**

The AUC and ROC curve plot showing the performance comparison between Phenolyzer and other tools, on four gene sets of different complex diseases. (a, c, e and g) For each software, the AUC is calculated as the area under the ROC curve. (b, d, f and h) The ROC curve is plotted as True Positive Rate versus False Positive Rate. 'Phenolyzer Phenotype' is the Phenolyzer results with phenotype terms as input (the same input as Phenomizer). 'Phenolyzer Logistic' is Phenolyzer with weights trained with Logistic Regression model, compared with 'Phenolyzer no training'. 'Phenolyzer Seed' is Phenolyzer's seed gene result without the seed gene growth step, thus only representing the genes found in Phenolyzer's disease-gene mapping knowledgebase.



**Supplementary Figure 5**

**Evaluation of Phenolyzer by phenotype terms as input.**

Phenolyzer with phenotype terms (rather than disease names) as input is able to prioritize most genes as 'Top 1' for the 14 monogenic diseases, which is similar as Phenomizer.



### Supplementary Figure 6

#### Phenolyzer's results on four case studies.

(a and b) The candidate gene lists generated from two studies on 'Craniopharyngiomas' and 'SHORT syndrome' were used as input into Phenolyzer. The network plot shows that *BRAF* and *PIK3R1* are the genes with the highest scores corresponding to each disease separately. (c) For the CNV study of 'Osteoporosis', the generated significant CNV regions were used as input, and the Phenolyzer network successfully identified the correct gene, *UGT2B17*. (d) Combined with wANNOVAR, we first filtered the variants into a small list, then included all the genes in the variant list as the input into Phenolyzer. The correct gene *PKLR* was identified as the top gene for 'hemolytic anemia'.



### Supplementary Figure 7

#### Illustration of the disease or phenotype term interpretation process.

The term is first processed through a word match to several different data source, DO (Disease Ontology), CTD Medic disease ontology vocabulary, HPO (Human Phenotype Ontology), OMIM synonym, OMIM descriptors, and Phenolyzer's compiled disease vocabulary. After the first match, the disease names are directly returned for Phenolyzer's compiled disease names and OMIM synonyms. For DO and CTD, an ontology search will retrieve all the descendent disease names and synonyms. For OMIM descriptors, they are mapped into OMIM diseases with a conditional probability as reliability. For HPO, an ontology search first finds all the descendent phenotypes, then the phenotypes are mapped into diseases with reliabilities.



**Supplementary Figure 8**

**Learning curve through the training with Gradient Descent Algorithm.**

The gradient descent algorithm iteratively reduces the cost and changes weight vector  $w$  into the direction opposite to the gradient of the cost function. After 10,000 iterations, with learning rate at 1, the slope of the curve is close to 0 and demonstrates that the number of learning steps is sufficient.

# Supplementary Note

## *The impact of input tokenization on Phenolyzer*

Based on the implementation of Phenolyzer, if a long disease name is tokenized into multiple short terms, the possibility of a match for each short term is larger than the original long term; as a result, the number of genes in the result should be increased and the recall rate may be improved. However, the cost associated with the improved recall rate is that the precision may be affected. To demonstrate this, we thoroughly tokenized 13 disease names from the 14 Mendelian disease names used in the manuscript; for example, ‘Spermatogenic failure, nonobstructive, Y-linked’ is tokenized into ‘Spermatogenic;failure;nonobstructive;Y;linked’, with each single word being treated as a single term. Our result shows that thorough tokenization increased the number of returned genes from 2,809 to 22,222 (median) and from 3,287 to 21,286 (mean), at a cost of incorrectly prioritizing 3 genes out of 15 genes (**Supplementary Dataset 1**).

## *Case study on exome sequencing and copy number variation data*

To better illustrate the power of Phenolyzer, below we present three case studies on how to use Phenolyzer to analyze exome-sequencing data and copy number variation (CNV) data and identify disease causal genes.

One group identified that a *BRAF* gene mutation drives growth of papillary craniopharyngiomas and targeted genotyping identified this mutation in all papillary craniopharyngiomas<sup>1</sup>. They first analyzed the whole-exome sequencing data from a cohort of adamantinomatous (n=12) and papillary craniopharyngiomas (n=3) and identified a small number of non-synonymous somatic mutations in both subtypes, including 490 variants within 444 genes. This gene list was supplied into Phenolyzer,

together with the disease term ‘craniopharyngiomas’ (**Supplementary Fig. 6**). *BRAF* shows up as the top gene. We also evaluated other competing tools, with the same term as input, and restricted results by the same input gene list. PosMed ranked *BRAF* as 6th. Genecards and SNPs3d returned a result list without the *BRAF* gene. As Phevor does not include the record for disease term ‘craniopharyngiomas’, we used ‘craniopharyngioma’ and the *BRAF* gene is ranked as 321st (see details in **Supplementary Table 6**).

Another group identified a *PI3KR1* mutation underlying SHORT syndrome and verified its functional impact in fibroblasts<sup>2</sup>. Whole exome-sequencing was conducted in 6 individuals from two families affected by SHORT syndrome. After variant calling and filtering, 22 variants within 22 genes were left in the candidate list. This gene list was then provided as input into Phenolyzer, together with the term ‘SHORT syndrome’. In Phenolyzer’s network, it is easily seen that *PI3KR1* is the most significant gene (**Supplementary Fig. 6**). After gene selection, PosMed can also rank *PIK3R1* as top 1. Genecards ranked *PIK3R1* as 2nd. SNPs3d does not have *PIK3R1* in the output. Phevor had no record for term ‘SHORT syndrome’ at all. In addition, we also tried ‘partial lipodystrophy’, ‘low body mass index’, ‘short stature’, ‘progeroid face’, and ‘Rieger anomaly’ (the phenotype descriptions in the original paper for SHORT syndrome) as input, and *PIK3R1* is still ranked as the ‘top1’ gene by Phenolyzer. We used ‘Lipodystrophy’, ‘Weight loss’, ‘Progeroid facial appearance’, ‘Rieger anomaly’, ‘Short stature’ as HPO terms for Phevor and *PIK3R1* is also ranked as top 1 (See details in **Supplementary Dataset 7**).

In the third example, a CNV study identified a CNV affecting the gene *UGT2B17* as a contributing factor for osteoporosis<sup>3</sup>. Case-control genome-wide CNV studies were conducted using Affymetrix Human Mapping 500K Arrays, with the cohort of 350 Han Chinese individuals with a history of hip osteoporosis and 350 healthy matched

controls. 727 significant CNVs were called from this study. These regions were used as input into Phenolyzer, together with the disease term ‘osteoporosis’. From the Phenolyzer’s network plot, *UGT2B17* shows up as the top gene (**Supplementary Fig. 6**). We also evaluated other competing tools, by first compiling a gene list from these CNVs (1,510 genes in total). For PosMed, *UGT2B17* ranked at 4th. For Genecards, *UGT2B17* ranked at 3rd. For SNPs3d and Phevor, the final gene list did not include *UGT2B17* (See details in **Supplementary Dataset 8**).

### ***Pipeline between wANNOVAR and Phenolyzer***

To facilitate users with whole genome or exome sequencing data rather than just a list of genes, we also implemented a wANNOVAR-Phenolyzer pipeline for analysis on VCF files at <http://wannovar.usc.edu><sup>4</sup>. Disease or phenotype terms are accepted as optional input fields here, then Phenolyzer is called to prioritize candidate genes directly from wANNOVAR output. In the wANNOVAR result page, the gene list prioritized by Phenolyzer can be directly retrieved. Additionally, the link to the Phenolyzer result page is also available as the ‘Network Visualization’ link.

For example, we previously reported an exome sequencing study identifying a mutation in *PKLR* as "unrelated finding" in a patient with hemolytic anemia, through a study originally designed to uncover the genetic basis of attention deficit and hyperactivity disorder (ADHD)<sup>5</sup>. The VCF file is used as the input into wANNOVAR, with ‘rare recessive Mendelian disease’ selected as disease model. In total, 87 variants were left after the filtration, whose corresponding genes are then submitted automatically as input into Phenolyzer together with the term ‘anemia’ or ‘hemolytic anemia’, by wANNOVAR. From the result network, the *PKLR* gene is ranked top with the term ‘hemolytic anemia’ (**Supplementary Fig. 6**). However, with the term ‘anemia’, *PKLR* ranked third. Thus, integrating wANNOVAR and Phenolyzer in the same pipeline can facilitate and expedite identifying disease causing variants, yet

more refined disease terms can further improve the accuracy of disease gene finding, when the disease can be caused by multiple genes.

### ***Additional Discussions***

Phenolyzer follows a strictly defined procedure including four steps - term interpretation, seed gene generation, seed gene growth and data integration. For term interpretation, at least a word match is needed to process the term, and the possibility to match the terms depends on the vocabularies of several different disease ontology systems, the synonyms provided by OMIM, and phenotype descriptors provided by the Human Phenotype Ontology. Some improvements can be made in the future to better explore all possible terms, including integrating several medical dictionaries and standardized vocabularies, such as Webster's medical dictionary, ICD9 and ICD10 vocabulary.

For the seed gene generation step, other databases will be incorporated in the future, such as DECIPHER<sup>6</sup>. We note that several heuristics are used in this step (Gene Score System), to translate association information and publication count into scores. The underlying logic is that the translated score is normalized proportionally to the rank percentage. For the seed gene growth step, similar heuristics are also used (Gene Prediction Score System). Despite the use of heuristics, our results demonstrated the effectiveness of the approach. To facilitate integration of gene-disease and gene-gene relationship databases, we now made an add-on system for the Phenolyzer command-line tool. As long as the user compile their own databases into a pre-defined format, it is straightforward to add databases into the Phenolyzer system. To demonstrate this, we integrated Mentha protein interaction database<sup>7</sup>, the Genetic Association Database<sup>8</sup>, DisGeNet<sup>9</sup> and the Genecards database into our web server as an option, with an *ad hoc* weight.

The Logistic Regression with Gradient Descent method is designed to optimize weights for integrating the scores of seed genes and different relationship types. We examined how the performance will change if we instead assign *ad hoc* weights to each feature (**Supplementary Fig. 4**). Although the logistic regression model is trained from four diseases (type 1 and 2 diabetes, coronary artery disease and Crohn's disease) that are totally different from the test set, the improvement over "no training" is still significant. Therefore, we used the optimal weights rather than arbitrarily selected weights in our software. In addition, we also provide the 'Weight Adjust' option for users to apply their own arbitrary weights, or even turn off a database by setting the weight to zero.

For the tool comparison, we noticed that inconsistent results appeared between monogenic diseases and complex diseases. We think the reason is that the monogenic disease and complex disease comparisons are two different types of comparisons. In monogenic disease comparisons, as long as the tool has the knowledge of the gene-disease mapping in a database, and can retrieve the record and prioritize it as top one, then it has a perfect performance. However, in complex disease comparison, we chose four disease gene sets – two from public databases and two from scientific literature. Each disease has a large number of genes to be positive genes. Thus the computational tool needs both high precision and recall rates to achieve good performance: precision means that the disease genes can be ranked higher than others, and recall means that a large candidate gene list can be found that includes the true disease genes. Therefore, it is not surprising that SNPs3d performs differently between these two types of tasks, as SNPs3d has high precision but has very limited recall.

Although Phenolyzer works well to find candidate genes for many diseases, its ability to identify the correct genes is to a large extent limited by the available biological

knowledge. For example, if a phenotype or disease has never been reported to be associated with any gene before, Phenolyzer is much less likely to find the candidate genes, unless a similar or related phenotype is available. Nevertheless, as Phenolyzer gives a continuous normalized score from 0 to 1 for each candidate gene, the integration between Phenolyzer score and other kinds of variant prediction scores (for example, SIFT scores, PolyPhen scores) may further increase power for finding candidate gene and variants, even if the genes are previously uncharacterized. Finally, we believe that an improved algorithm that integrates both previous gene-disease and gene-gene relationship knowledge and an improved score for variant deleteriousness may offer the greatest power to prioritize variants from whole genome and exome sequencing data.

# Reference

1. Brastianos, P.K. et al. *Nature genetics* **46**, 161-165 (2014).
2. Chudasama, K.K. et al. *The American Journal of Human Genetics* **93**, 150-157 (2013).
3. Yang, T.-L. et al. *The American Journal of Human Genetics* **83**, 663-674 (2008).
4. Chang, X. & Wang, K. *Journal of medical genetics* **49**, 433-436 (2012).
5. Lyon, G.J. et al. *Discov Med* **12**, 41-55 (2011).
6. Bragin, E. et al. *Nucleic acids research*, gkt937 (2013).
7. Calderone, A., Castagnoli, L. & Cesareni, G. *Nature methods* **10**, 690-691 (2013).
8. Becker, K.G., Barnes, K.C., Bright, T.J. & Wang, S.A. *Nature genetics* **36**, 431-432 (2004).
9. Bauer-Mehren, A., Rautschka, M., Sanz, F. & Furlong, L.I. *Bioinformatics* **26**, 2924-2926 (2010).

**Supplementary Table 1. Descriptive comparison of functionality between Phenolyzer and other similar tools.**

| <b>Tool</b>       | <b>Gene disease phenotype mapping</b>      | <b>Phenotype and disease interpretation</b>       | <b>Input format for disease and phenotype</b>   | <b>Algorithm</b>                                                              | <b>Platform</b>   | <b>Data visualization</b>                            | <b>Gene prioritization (without variant)</b> | <b>Variant prioritization( disease or phenotype specific)</b> | <b>CNV prioritization</b> |
|-------------------|--------------------------------------------|---------------------------------------------------|-------------------------------------------------|-------------------------------------------------------------------------------|-------------------|------------------------------------------------------|----------------------------------------------|---------------------------------------------------------------|---------------------------|
| <b>Phenolyzer</b> | OMIM, ClinVar, Orphanet, GWAS, GeneReviews | DO, HPO, CTD Medic, OMIM descriptors and synonyms | Any disease or phenotype related terms, OMIM ID | Ontology search; gene-disease and gene-gene score system; logistic regression | Web, command line | Interactive network; interactive bar plot, wordcloud | Yes                                          | Yes                                                           | Yes                       |
| <b>PosMed</b>     | Literature                                 | None                                              | Keywords                                        | Neural network; literature mining                                             | Web               | None                                                 | Yes                                          | No                                                            | No                        |
| <b>Genecards</b>  | About 10 databases                         | None                                              | Keywords                                        | Database mining                                                               | Web               | None                                                 | Yes                                          | No                                                            | No                        |
| <b>SNPs3d</b>     | OMIM, literature                           | None                                              | Keywords                                        | Literature and database mining                                                | Web               | Network by java plugin                               | Yes                                          | No                                                            | No                        |
| <b>Phevor</b>     | Ontology annotation(DO, HPO, etc)          | DO, HPO, or depends on Phenomizer                 | Specific names, Phenomizer output               | Ontology propagation                                                          | Web               | Variant plot                                         | No                                           | Yes                                                           | No                        |
| <b>Phenomizer</b> | HPO, OMIM, Orphanet, Decipher              | HPO                                               | HPO terms                                       | Ontology similarity search with p values                                      | Web               | Ontology visualization                               | Yes                                          | No                                                            | No                        |

**Supplementary Table 2. Phenolyzer’s performance on discovering the 590 known disease genes from a newborn sequencing study and on predicting the 55 newly published disease genes from four human genetics journals.**

| <b>590 Known disease genes</b> | <b>Top1</b> | <b>Top5</b> | <b>Top10</b> | <b>Top50</b> | <b>In the list</b> |
|--------------------------------|-------------|-------------|--------------|--------------|--------------------|
| <b>Phenolyzer</b>              | 81.2%       | 89.3%       | 90.7%        | 92.9%        | 93.4%              |

  

| <b>55 Newly published disease genes</b> | <b>Top 5% ratio</b> | <b>Top 10% ratio</b> | <b>Top 20% ratio</b> | <b>Top 50% ratio</b> | <b>In the list</b> |
|-----------------------------------------|---------------------|----------------------|----------------------|----------------------|--------------------|
| <b>Phenolyzer</b>                       | 43.6%               | 47.3%                | 56.4%                | 70.9%                | 96.4%              |
| <b>PosMed</b>                           | 36.4%               | 47.3%                | 50.9%                | 60.0%                | 70.9%              |
| <b>Phvor</b>                            | 20.0%               | 29.1%                | 41.8%                | 50.9%                | 85.5%              |
| <b>Phenomizer</b>                       | 30.9%               | 38.2%                | 41.8%                | 50.9%                | 60.0%              |
| <b>Genecards</b>                        | 5.5%                | 14.5%                | 21.8%                | 41.8%                | 58.2%              |
